# Supplementary material
Source: publisher site journal article supplement (https://www.dovepress.com/article/543188)
Supplement: Supplementary file 1 [file 543188%20Suplementary%20materials.docx]

**Experiences of immunoglobulin therapy for those with a confirmed diagnosis of Chronic Inflammatory Demyelinating Polyneuropathy: A mixed-methods study with a qualitative patient perspective focus.**

**Supplementary materials**

**Table S1: Coding groups (via NVIVO 12)**

| **Categories** | **Initial codes** |
| --- | --- |
| Assistive devices | Electric scooter |
|  | Wheelchair |
|  | Walker/ Zimmer frame |
|  | Walking stick |
|  | Leg brace |
| Employment | Working |
|  | Not working |
| Household tasks | Cooking |
|  | Laundry |
|  | Opening jars |
|  | Sweeping |
|  | Vacuuming |
|  | Washing dishes |
| Hobbies | At home |
|  | Outside home |
| Physical function | Raising arms |
|  | Sleeping |
|  | Using hands |
|  | Walking |
|  | Driving |
| Pain levels | Mild pain |
|  | Moderate pain |
|  | Severe pain |
| Relationships | Children |
|  | Parents |
|  | Spouse |
|  | Friends |
|  | Pets/ support animals |
| Isolation | Isolation in home |
| Emotions | Anger |
|  | Anxiety (mild) |
|  | Fear |
|  | Frustration |
|  | Relief |
|  | Sadness/ depression |
| IVIG | IVIG treatments |
| SCIG | SCIG treatments |
| Non-IG treatments | Corticosteroids |
|  | Plasmapheresis |
|  | Rituximab |
|  | Pain relief |
| Future changes to treatments | Wish to swap to IG treatment |
|  | Wish to swap to non-IG treatment |
|  | Wish for dose reduction |
|  | Wish for discontinuation |
| Treatment positives | Convenience |
|  | Efficacy |
|  | Flexibility |
|  | Administration method |
| Treatment negatives | Cost |
|  | Inconvenience |
|  | Lack of efficacy |
|  | Life-long burden |
|  | Administration method |
|  | Side effects |
| Three words to describe IG | IVIG words |
|  | SCIG words |
| CIDP timeline | Life before CIDP |
|  | Awareness of CIDP prior to diagnosis |
|  | Diagnosis of CIDP |
|  | Hospitalizations |
|  | Treatments prior to IG |
|  | Starting IG |
|  | Current IG dose and frequency |
|  | IG dose switching |
|  | IG frequency switching |
|  | Treatment switching |
|  | Lapse reason |
|  | High points |
|  | Low points |
|  | Future worries |
| CIDP severity evaluation (HCP reported) | Reflex tests |
|  | Strength tests |
|  | HCP knowledge levels |
| CIDP severity evaluation (self-reported) | Fatigue level |
|  | Pain level |
|  | Weakness in muscles |
|  | Current outcome |
| HCP communication | Feelings of neglect |
|  | Follow-up by HCPs |
| Sentiment | Positive |
|  | Negative |

**Table S2: CIDP patient characteristics**

| **Respondent characteristics** | **Total** | |
| --- | --- | --- |
| **(n=42)** | |
| **Summary** | **n** |
| **Age, % (n)** |  |  |
| 18-45 years | 29% (n=12) | |
| 46-64 years | 48% (n=20) | |
| 65+ years | 24% (n=10) | |
| **Employment, % (n)** |  | |
| Work full time | 17% (n=7) | |
| Work part time | 14% (n=6) | |
| Retired | 26% (n=11) | |
| On disability | 40% (n=17) | |
| Unemployed | 2% (n=1) | |
| **Sex at birth, % (n)** |  |  |
| Female | 67% (n=28) | |
| Male | 33% (n=14) | |
| **Location** |  |  |
| US | 74% (n=31) | |
| EU | 26% (n=11) | |
| **Time since CIDP diagnosis, % (n)** |  |  |
| 2 years or less | 12% (n=5) | |
| 3-5 years | 36% (n=15) | |
| 6-8 years | 21% (n=9) | |
| 9-11 years | 21% (n=9) | |
| 12+ years | 10% (n=4) | |
| **Time between first symptoms and diagnosis, % (n)** |  |  |
| 2 years or less | 76% (n=32) | |
| 3-4 years | 12% (n=5) | |
| 5 years or more | 12% (n=5) | |
| **Current CIDP treatment, % (n)** |  |  |
| IVIG | 62% (n=26) | |
| SCIG | 24% (n=10) | |
| Corticosteroids | 14% (n=6) | |
| Plasma exchange | 2% (n=1) | |
| Traditional immunosuppressive medication* | 10% (n=4) | |
| Rituximab | 5% (n=2) | |
|  |  | |
| **Length of time taking current medication, % (n)** |  |  |
| 3 to 6 months | 3% (n=1) | |
| 6 to 12 months | 14% (n=5) | |
| 1 to 2 years | 11% (n=4) | |
| More than 2 years | 72% (n=26) | |
| **Tests conducted to help diagnose their CIDP, % (n)** |  |  |
| Reflex checks | 100% (n=42) | |
| Nerve conduction tests | 98% (n=41) | |
| Blood tests | 90% (n=38) | |
| Needle EMG tests | 83% (n=35) | |
| Lumbar puncture | 71% (n=30) | |
| Magnetic resonance imaging (MRI) | 69% (n=29) | |
| Ultrasound | 36% (n=15) | |
| Nerve biopsy | 7% (n=3) | |
| **Devices to assist with walking - Currently used, % (n)** |  |  |
| Cane/walking stick on one side | 57% (n=24) | |
| Walker / Zimmer frame / Rollator | 50% (n=21) | |
| Wheelchair | 45% (n=19) | |
| Cane/walking stick /crutches on both sides | 29% (n=12) | |
| Leg brace/ankle brace | 26% (n=11) | |
| Electric scooter | 24% (n=10) | |
| Other | 12% (n=5) | |
| None of these | 21% (n=9) | |
| **Patient-Reported Outcome Measurement Information System (PROMIS) Physical Function (PF) Short Form (SF)-11a banding** |  |  |
| 21-33 | 36% (n=15) | |
| 34-44 | 43% (n=18) | |
| 45-58 | 21% (n=9) | |
| **Patient Acceptable Symptom Scale (PASS), % (n)** |  | |
| Considering current state as satisfactory | 45% (n=19) | |
| **Work Productivity and Activity Impairment General Health (WPAI-GH), mean (n)** |  | |
| Absenteeism (work time missed) | 12% (n=13) | |
| Presenteeism (impairment while working) | 30% (n=13) | |
| Overall work productivity loss | 38% (n=13) | |
| Activity impairment | 58% (n=42) | |

**NB:** *Traditional immunosuppressants include: mycophenolate, azathioprine, cyclosporine, cyclophosphamide, methotrexate.
